# Supplementary material for: Standardisation of labial salivary gland histopathology in clinical trials in primary Sjögren's syndrome
Source: PubMed Central journal article supplement (PMC5530351; doi:10.1136/annrheumdis-2016-210448), 2017-06-09
Supplement: annrheumdis-2016-210448supp001.pdf [file annrheumdis-2016-210448supp001.pdf]

Supplementary Table 1. Points relevant to clinical trials that were rejected in the eDephi process, showing strength of recommendation (A-D) based on available evidence, according to the scale (A to D) recommended by the Oxford Centre for Evidence-based Medicine.<sup>22</sup> The level of agreement (0-10 scale) amongst participants is also shown, represented by mean scores and the percentage of respondents who scored the point  $\geq 6/10$ .

| Point                                       |                                                                                                                                                                                                                                                                                                                | Strength of recommendation | Number of respondents | Mean score (sd) | % $\geq 6$ |
|---------------------------------------------|----------------------------------------------------------------------------------------------------------------------------------------------------------------------------------------------------------------------------------------------------------------------------------------------------------------|----------------------------|-----------------------|-----------------|------------|
| <b>Guidance relevant to clinical trials</b> |                                                                                                                                                                                                                                                                                                                |                            |                       |                 |            |
| 1                                           | A focus score for follow-up samples should only be provided where the baseline sample has features consistent with FLS.                                                                                                                                                                                        | D                          | 37                    | 6.1 (3.4)       | 65         |
| 2                                           | Consideration should be given to the measurement of the percentage of plasma cells positive for IgA and IgG                                                                                                                                                                                                    | C/D                        | 37                    | 6.6 (2.3)       | 65         |
| 3                                           | Consideration should be given to measuring glandular epithelial cell MHC class II expression                                                                                                                                                                                                                   | C/D                        | 37                    | 6.3 (2.3)       | 65         |
| 4                                           | Despite the apparent stability or slow progression of histological features, a placebo group should preferably be included in a single agent study even in early phase mechanism-of-action studies where this is the primary outcome, until further experience with the heterogeneity of sampling is achieved. | D                          | 38                    | 7.0 (2.5)       | 74         |
